# Supplementary material for: A series of 2D and 3D metal–organic frameworks based on different polycarboxylate anions and a flexible 2,2′-bis(1H-imidazolyl)ether ligand
Source: Royal Society of Chemistry journal article supplement (doi:10.1039/b804578j), 2008-01-01
Supplement: b804578j.pdf [file b804578j.pdf]

## Electronic supplementary information (ESI)

---

# **A Series of 2D to 3D Metal Organic Frameworks Based on Different Polycarboxylate Anions and Flexible 2,2'-bis(1*H*-imidazolyl)ether Ligand**

**Lai-Ping Zhang, Jin Yang, Jian-Fang Ma,\* Zhi-Fang Jia Yun-Peng Xie and Guo-Hua Wei**

*Key Lab of Polyoxometalate Science, Department of Chemistry, Northeast Normal University, Changchun 130024, People's Republic of China*

\* Correspondence author: Prof. Jian-Fang Ma

E-mail: jianfangma@yahoo.com.cn

Fax: +86-431-85098620

**Table S1.** Selected bond distances (Å) and angles (°) for **1**.

|                               |            |                               |            |
|-------------------------------|------------|-------------------------------|------------|
| Ni(1)-N(1)                    | 2.0344(18) | Ni(1)-O(2)                    | 2.0843(18) |
| Ni(1)-O(1)                    | 2.1644(14) |                               |            |
| N(1)-Ni(1)-N(1) <sup>#2</sup> | 88.24(10)  | N(1)-Ni(1)-O(2)               | 95.93(7)   |
| N(1)-Ni(1)-O(1)               | 157.98(6)  | O(2)-Ni(1)-O(1)               | 62.09(5)   |
| O(1)-Ni(1)-O(1) <sup>#2</sup> | 93.72(8)   | O(2)-Ni(1)-O(2) <sup>#3</sup> | 161.07(8)  |

Symmetry codes for **1**: <sup>#2</sup> -x,y,3/2-z; <sup>#3</sup> 1+x,-y,1/2+z

**Table S2.** Selected bond distances (Å) and angles (°) for **2**.

|                               |           |                                |           |
|-------------------------------|-----------|--------------------------------|-----------|
| Cu(1)-N(1)                    | 1.965(3)  | Cu(1)-O(1)                     | 1.986(3)  |
| Cu(2)-O(5)                    | 1.982(2)  | Cu(2)-N(4)                     | 2.000(3)  |
| N(1)-Cu(1)-N(1) <sup>#1</sup> | 180       | N(1)-Cu(1)-O(1)                | 89.83(12) |
| O(1)-Cu(1)-O(1) <sup>#1</sup> | 180       | O(5) <sup>#3</sup> -Cu(2)-O(5) | 180       |
| O(5)-Cu(2)-N(4)               | 89.46(11) | N(4)-Cu(2)-N(4) <sup>#3</sup>  | 180       |

Symmetry codes for **2**: <sup>#1</sup> 2-x,2-y,2-z; <sup>#3</sup> 1-x,1-y,3-z

**Table S3.** Selected bond distances (Å) and angles (°) for **3**.

|                                              |           |                                              |           |
|----------------------------------------------|-----------|----------------------------------------------|-----------|
| Cu(1)-O(1)                                   | 1.991(2)  | Cu(1)-N(4) <sup>#1</sup>                     | 1.991(3)  |
| Cu(2)-O(4)                                   | 1.978(2)  | Cu(2)-N(1) <sup>#4</sup>                     | 2.005(3)  |
| Cu(2)-O(3)                                   | 2.599(2)  |                                              |           |
| O(1)-Cu(1)-O(1) <sup>#3</sup>                | 180       | O(1)-Cu(1)-N(4) <sup>#1</sup>                | 91.44(10) |
| O(1) <sup>#2</sup> -Cu(1)-N(4) <sup>#1</sup> | 88.56(10) | N(4) <sup>#1</sup> -Cu(1)-N(4) <sup>#2</sup> | 180       |
| O(4) <sup>#4</sup> -Cu(2)-O(4)               | 180       | O(4) <sup>#4</sup> -Cu(2)-N(1)               | 88.91(11) |
| O(4) <sup>#4</sup> -Cu(2)-N(1) <sup>#4</sup> | 91.09(11) | N(1)-Cu(2)-N(1) <sup>#4</sup>                | 180       |

Symmetry codes for **3**: <sup>#1</sup> 1/2-x,1/2+y,1/2-z; <sup>#2</sup> -1/2+x,1/2-y,-1/2+z; <sup>#3</sup> 1-x,-y,1-z;

<sup>#4</sup> -x,-y,-z

**Table S4.** Selected bond distances (Å) and angles (°) for **4**.

|            |            |                          |            |
|------------|------------|--------------------------|------------|
| Co(1)-N(1) | 2.1281(18) | Co(1)-N(4) <sup>#1</sup> | 2.1126(16) |
| Co(1)-O(1) | 2.1030(14) | Co(1)-O(2) <sup>#2</sup> | 2.1417(16) |
| Co(1)-O(3) | 2.1137(14) | Co(1)-O(4) <sup>#3</sup> | 2.1471(14) |

|                                              |          |                                              |           |
|----------------------------------------------|----------|----------------------------------------------|-----------|
| O(1)-Co(1)-N(4) <sup>#1</sup>                | 97.54(6) | O(1)-Co(1)-O(3)                              | 169.73(5) |
| N(4) <sup>#1</sup> -Co(1)-O(3)               | 89.69(6) | O(1)-Co(1)-N(1)                              | 90.75(6)  |
| N(4) <sup>#1</sup> -Co(1)-N(1)               | 94.26(7) | O(3)-Co(1)-N(1)                              | 96.00(6)  |
| O(1)-Co(1)-O(2) <sup>#2</sup>                | 78.53(5) | N(4) <sup>#1</sup> -Co(1)-O(2) <sup>#2</sup> | 91.64(6)  |
| O(3)-Co(1)-O(2) <sup>#2</sup>                | 94.04(6) | N(1)-Co(1)-O(2) <sup>#2</sup>                | 168.37(6) |
| O(1)-Co(1)-O(4) <sup>#3</sup>                | 94.66(6) | N(4)-Co(1)-O(4) <sup>#3</sup>                | 167.53(6) |
| O(3)-Co(1)-O(4) <sup>#3</sup>                | 94.56(6) | N(1)-Co(1)-O(4) <sup>#3</sup>                | 88.62(6)  |
| O(2) <sup>#2</sup> -Co(1)-O(4) <sup>#3</sup> | 87.76(6) |                                              |           |

Symmetry codes for 4: <sup>#1</sup> 1-x,-y,1-z; <sup>#2</sup> 1-x,-y,-z; <sup>#3</sup> -x,-y,-z

**Table S5.** Selected bond distances (Å) and angles (°) for 5.

|                                |          |                                |           |
|--------------------------------|----------|--------------------------------|-----------|
| Cu(1)-N(1)                     | 1.976(5) | Cu(1)-O(4)                     | 2.006(4)  |
| Cu(1)-O(5)                     | 2.614(1) | Cu(2)-O(3)                     | 2.596(1)  |
| Cu(2)-N(4)                     | 1.986(5) | Cu(2)-O(2)                     | 2.030(4)  |
| N(1)-Cu(1)-N(1) <sup>#1</sup>  | 180      | N(1)-Cu(1)-O(4)                | 89.2(2)   |
| N(1) <sup>#1</sup> -Cu(1)-O(4) | 90.8(2)  | O(4) <sup>#1</sup> -Cu(1)-O(4) | 180       |
| N(4) <sup>#3</sup> -Cu(2)-N(4) | 180      | N(4) <sup>#3</sup> -Cu(2)-O(2) | 91.00(19) |
| N(4)-Cu(2)-O(2)                | 89.0(2)  | O(2)-Cu(2)-O(2) <sup>#3</sup>  | 180       |

Symmetry codes for 5: <sup>#1</sup> 1-x,2-y,1-z; <sup>#3</sup> -x,2-y,-z

**Table S6.** Selected bond distances (Å) and angles (°) for 6.

|                                              |           |                                |            |
|----------------------------------------------|-----------|--------------------------------|------------|
| Co(1)-O(2)                                   | 1.983(2)  | Co(1)-O(5) <sup>#3</sup>       | 1.9980(19) |
| Co(1)-N(1) <sup>#4</sup>                     | 2.033(2)  | Co(1)-N(4)                     | 2.014(3)   |
| Co(2)-O(9) <sup>#1</sup>                     | 1.980(2)  | Co(2)-N(5)                     | 2.021(3)   |
| Co(2)-O(6)                                   | 2.018(2)  | Co(2)-N(8) <sup>#2</sup>       | 2.022(3)   |
| O(2)-Co(1)-O(5) <sup>#3</sup>                | 112.09(9) | O(2)-Co(1)-N(4)                | 121.33(10) |
| O(5) <sup>#3</sup> -Co(1)-N(4)               | 110.26(9) | O(2)-Co(1)-N(1) <sup>#4</sup>  | 104.15(9)  |
| O(5) <sup>#3</sup> -Co(1)-N(1) <sup>#4</sup> | 98.28(9)  | N(4)-Co(1)-N(1) <sup>#4</sup>  | 107.86(10) |
| O(9) <sup>#1</sup> -Co(2)-O(6)               | 97.76(9)  | O(9) <sup>#1</sup> -Co(2)-N(5) | 105.45(10) |

|                                     |                   |                                                  |                   |
|-------------------------------------|-------------------|--------------------------------------------------|-------------------|
| <b>O(6)-Co(2)-N(5)</b>              | <b>107.52(10)</b> | <b>O(9)<sup>#1</sup>-Co(2)-N(8)<sup>#2</sup></b> | <b>112.21(10)</b> |
| <b>O(6)-Co(2)-N(8)<sup>#2</sup></b> | <b>112.18(10)</b> | <b>N(5)-Co(2)-N(8)<sup>#2</sup></b>              | <b>119.36(11)</b> |

Symmetry codes for **6**: <sup>#1</sup> x,3/2-y,-1/2+z; <sup>#2</sup> 2-x,1-y,1-z; <sup>#3</sup> x,1/2-y,-1/2+z;  
<sup>#4</sup> 1-x,-y,1-z

**Table S7.** Selected bond distances (Å) and angles (°) for **7**.

|                                                  |                   |                                                  |                   |
|--------------------------------------------------|-------------------|--------------------------------------------------|-------------------|
| <b>Cu(1)-O(4)</b>                                | <b>1.936(2)</b>   | <b>Cu(1)-O(5)</b>                                | <b>1.967(2)</b>   |
| <b>Cu(1)-O(6)</b>                                | <b>1.973(2)</b>   | <b>Cu(1)-N(4)</b>                                | <b>1.992(3)</b>   |
| <b>Cu(1)-O1W<sup>#1</sup></b>                    | <b>2.541(6)</b>   | <b>Cu(2)-O3<sup>#2</sup></b>                     | <b>2.456(4)</b>   |
| <b>Cu(2)-O6<sup>#3</sup></b>                     | <b>2.533(8)</b>   | <b>Cu(2)-O(1)</b>                                | <b>1.962(2)</b>   |
| <b>Cu(2)-O(5)<sup>#3</sup></b>                   | <b>1.9766(19)</b> | <b>Cu(2)-O(8)<sup>#4</sup></b>                   | <b>1.952(2)</b>   |
| <b>Cu(2)-N(1)</b>                                | <b>1.985(3)</b>   | <b>Cu(3)-O(2)</b>                                | <b>1.985(2)</b>   |
| <b>Cu(3)-O(3)<sup>#7</sup></b>                   | <b>2.257(2)</b>   | <b>Cu(3)-O(5)<sup>#6</sup></b>                   | <b>1.978(2)</b>   |
| <b>O1W<sup>#1</sup>...O7</b>                     | <b>2.643(5)</b>   |                                                  |                   |
| <b>O(4)-Cu(1)-O(5)</b>                           | <b>96.26(9)</b>   | <b>O(4)-Cu(1)-O(6)</b>                           | <b>174.05(13)</b> |
| <b>O(5)-Cu(1)-O(6)</b>                           | <b>86.68(8)</b>   | <b>O(4)-Cu(1)-N(4)</b>                           | <b>87.46(11)</b>  |
| <b>O(5)-Cu(1)-N(4)</b>                           | <b>167.84(11)</b> | <b>O(6)-Cu(1)-N(4)</b>                           | <b>88.63(10)</b>  |
| <b>O(8)<sup>#4</sup>-Cu(2)-O(1)</b>              | <b>169.68(10)</b> | <b>O(8)<sup>#4</sup>-Cu(2)-O(5)<sup>#7</sup></b> | <b>93.04(9)</b>   |
| <b>O(1)-Cu(2)-O(5)<sup>#7</sup></b>              | <b>89.49(9)</b>   | <b>O(8)<sup>#4</sup>-Cu(2)-N(1)</b>              | <b>88.16(10)</b>  |
| <b>O(1)-Cu(2)-N(1)</b>                           | <b>90.42(10)</b>  | <b>O(5)<sup>#7</sup>-Cu(2)-N(1)</b>              | <b>173.73(10)</b> |
| <b>O(5)<sup>#7</sup>-Cu(3)-O(5)<sup>#6</sup></b> | <b>180</b>        | <b>O(5)<sup>#7</sup>-Cu(3)-O(2)<sup>#5</sup></b> | <b>88.75(9)</b>   |
| <b>O(5)<sup>#7</sup>-Cu(3)-O(2)</b>              | <b>91.25(9)</b>   | <b>O(5)<sup>#6</sup>-Cu(3)-O(2)</b>              | <b>88.75(9)</b>   |
| <b>O(2)<sup>#5</sup>-Cu(3)-O(2)</b>              | <b>180</b>        | <b>O(5)<sup>#7</sup>-Cu(3)-O(3)<sup>#7</sup></b> | <b>94.36(8)</b>   |
| <b>O(5)<sup>#6</sup>-Cu(3)-O(3)<sup>#7</sup></b> | <b>85.64(8)</b>   | <b>O(2)<sup>#5</sup>-Cu(3)-O(3)<sup>#7</sup></b> | <b>94.72(10)</b>  |
| <b>O(2)-Cu(3)-O(3)<sup>#7</sup></b>              | <b>85.28(10)</b>  | <b>O(5)<sup>#7</sup>-Cu(3)-O(3)<sup>#6</sup></b> | <b>85.64(8)</b>   |
| <b>O(5)<sup>#6</sup>-Cu(3)-O(3)<sup>#6</sup></b> | <b>94.36(8)</b>   | <b>O(2)<sup>#5</sup>-Cu(3)-O(3)<sup>#6</sup></b> | <b>85.28(10)</b>  |
| <b>O(2)-Cu(3)-O(3)<sup>#6</sup></b>              | <b>94.72(10)</b>  | <b>O(3)<sup>#7</sup>-Cu(3)-O(3)<sup>#6</sup></b> | <b>180</b>        |

Symmetry codes for **7**: <sup>#1</sup> -1+x,1/2-y,1-z; <sup>#2</sup> -x,-1/2+y,1/2-z; <sup>#3</sup> x,1/2-y,-1/2+z;  
<sup>#4</sup> 1/2+x,-1/2+y,1/2-z; <sup>#5</sup> -x,-y,-z; <sup>#6</sup> -x,-1/2+y,1/2-z; <sup>#7</sup> x,1/2-y,-1/2+z

**Table S8.** Selected bond distances (Å) and angles (°) for **8**.

---

|                                                  |                  |                                                  |                   |
|--------------------------------------------------|------------------|--------------------------------------------------|-------------------|
| <b>Cu(1)-N(4)<sup>#4</sup></b>                   | <b>1.992(5)</b>  | <b>Cu(1)-O(1)</b>                                | <b>1.979(3)</b>   |
| <b>Cu(1)-O(2W)</b>                               | <b>2.320(6)</b>  | <b>Cu(2)-N(1)</b>                                | <b>1.966(5)</b>   |
| <b>Cu(2)-O(1W)</b>                               | <b>1.957(4)</b>  | <b>Cu(2)-O(4)<sup>#5</sup></b>                   | <b>1.963(3)</b>   |
| <b>Cu(2)-O(5)</b>                                | <b>1.948(4)</b>  | <b>O1W...O6<sup>#2</sup></b>                     | <b>2.803(5)</b>   |
| <b>O2W...O3<sup>#6</sup></b>                     | <b>2.870(6)</b>  |                                                  |                   |
| <b>O(1)<sup>#3</sup>-Cu(1)-N(4)<sup>#4</sup></b> | <b>89.62(17)</b> | <b>O(1)-Cu(1)-N(4)<sup>#4</sup></b>              | <b>91.04(17)</b>  |
| <b>O(1)-Cu(1)-N(4)<sup>#1</sup></b>              | <b>89.62(17)</b> | <b>N(4)<sup>#4</sup>-Cu(1)-N(4)<sup>#1</sup></b> | <b>166.9(3)</b>   |
| <b>O(1)-Cu(1)-O(2W)</b>                          | <b>87.10(12)</b> | <b>N(4)<sup>#4</sup>-Cu(1)-O(2W)</b>             | <b>96.55(14)</b>  |
| <b>O(5)-Cu(2)-O(1W)</b>                          | <b>91.00(17)</b> | <b>O(5)-Cu(2)-O(4)<sup>#5</sup></b>              | <b>171.88(16)</b> |
| <b>O(1W)-Cu(2)-O(4)<sup>#5</sup></b>             | <b>87.76(16)</b> | <b>O(5)-Cu(2)-N(1)</b>                           | <b>91.25(18)</b>  |
| <b>O(1W)-Cu(2)-N(1)</b>                          | <b>173.1(2)</b>  | <b>O(4)<sup>#5</sup>-Cu(2)-N(1)</b>              | <b>90.92(18)</b>  |

---

Symmetry codes for **8**: <sup>#1</sup> 1-x,1/2+y,3/2-z; <sup>#2</sup> 1-x,y,3/2-z; <sup>#3</sup> -x,y,3/2-z;

<sup>#4</sup> 1/2-x,1/2+y,z; <sup>#5</sup> 3/2-x,-1/2+y,z; <sup>#6</sup> 1/2-x,-1/2+y,z

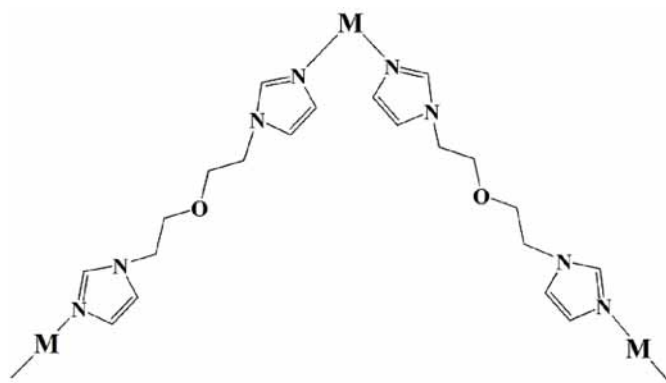

**I**

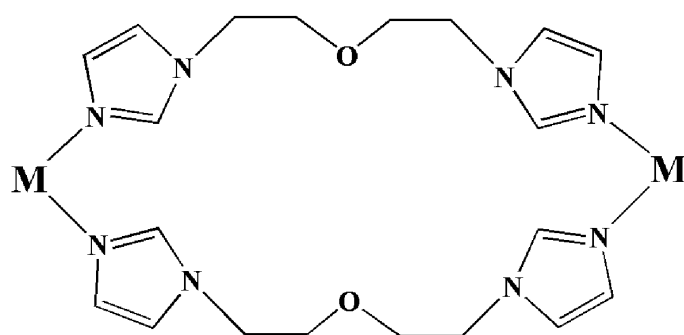

**II**

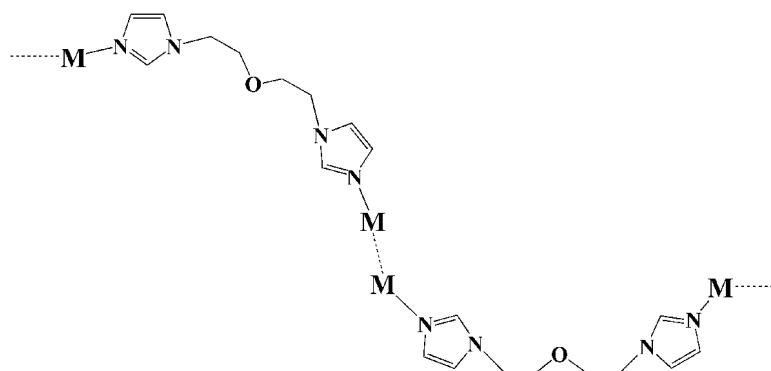

**III**

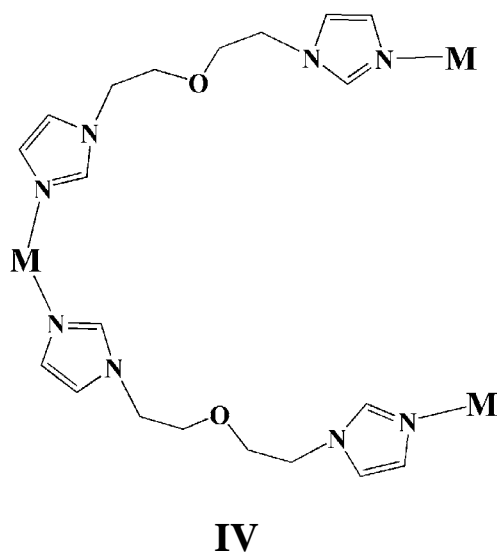

**Scheme S1.** Four coordination modes of the BIE ligand with the metals in this paper.

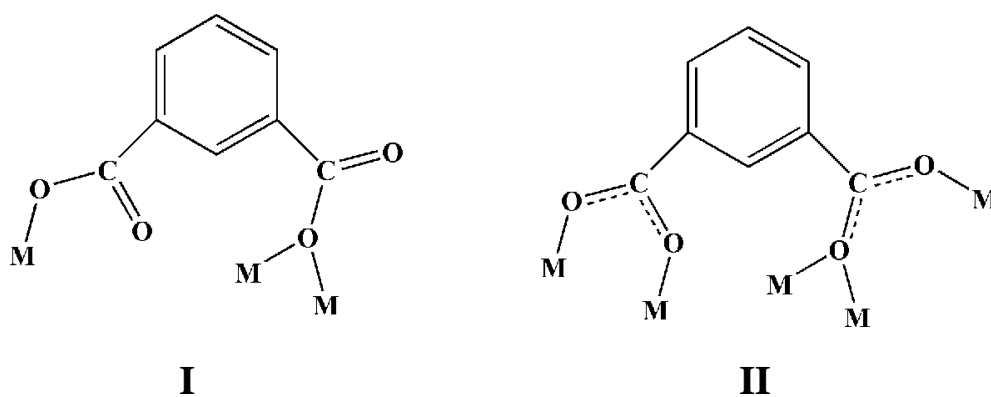

**Scheme S2.** Coordination modes of L5 anion in compound 7.

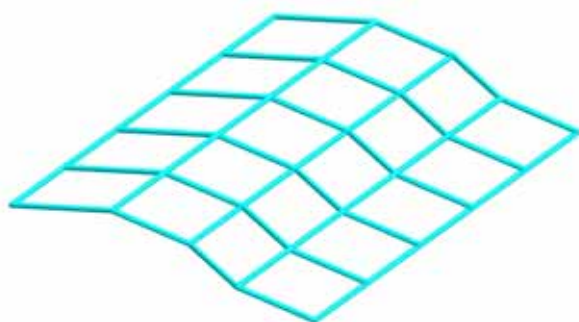

**Fig. S1.** View of the 2D 4<sup>4</sup>-sql network of **1**.

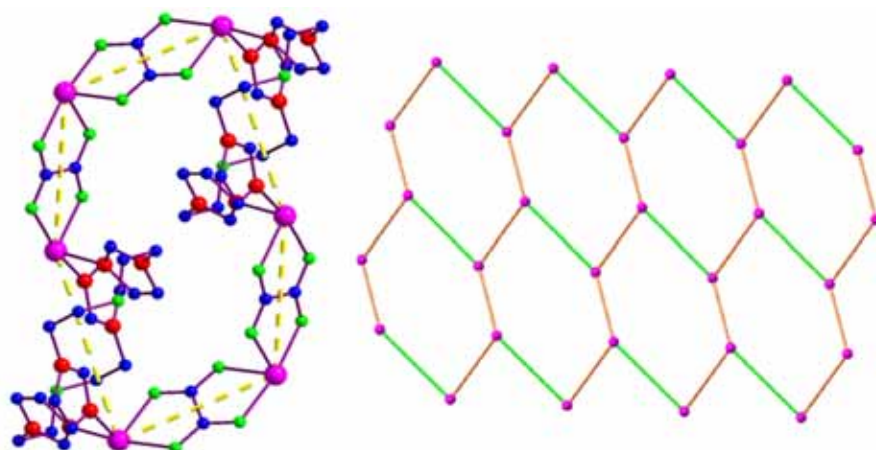

**Fig. S2.** One 6-membered ring is shown for each net shortest closed circuits, and the **hcb** net of compound **4**.

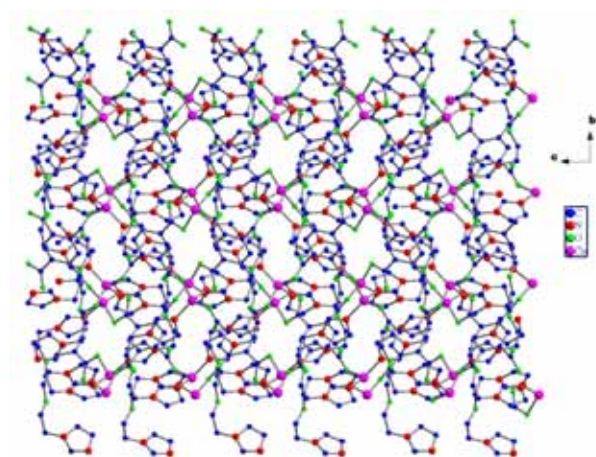

**Fig. S3.** The 3D complicated framework of compound **6**.

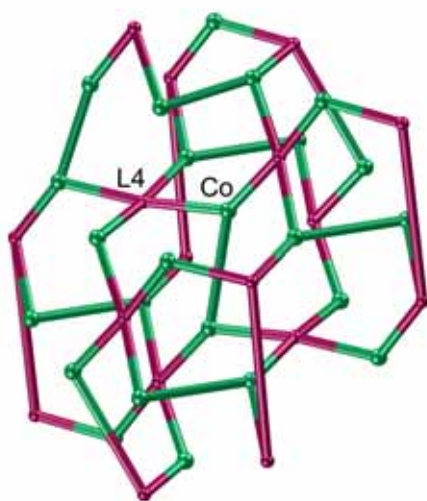

**Fig. S4.** Schematic diagram (OLEX) showing the  $(8^3)_2(8^5 \cdot 10)$  network of **6**.



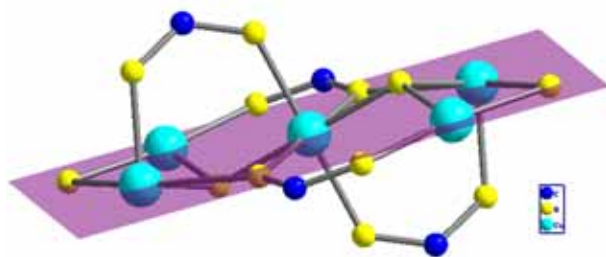

**Fig. S5.** View of the five coplanar Cu(II) atoms of compound **7**.

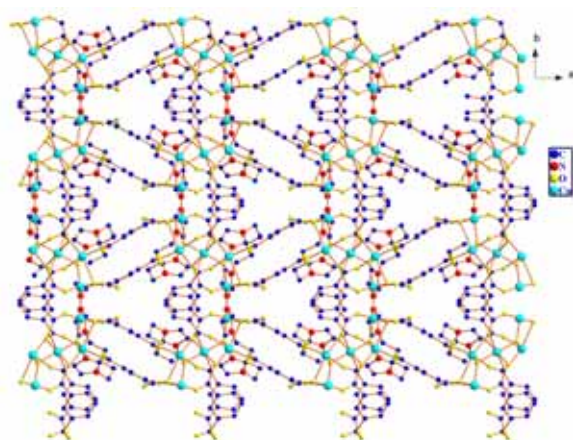

**Fig. S6.** View of the 3D complicated framework of **7**.

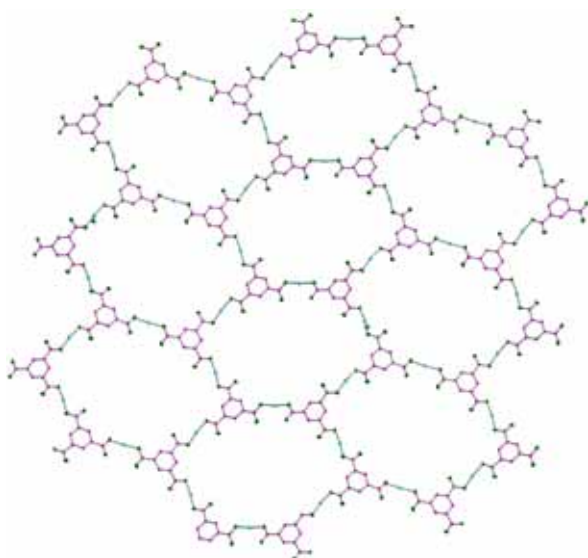

**Fig. S7.** View of a single layer composed of L6 anions and Cu(II) ions with  $6^3$  network within compound **8**.

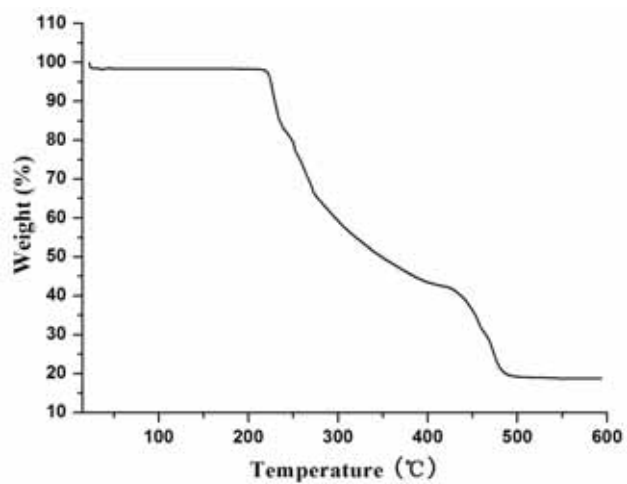

**Fig. S8.** TGA curve of **3**.

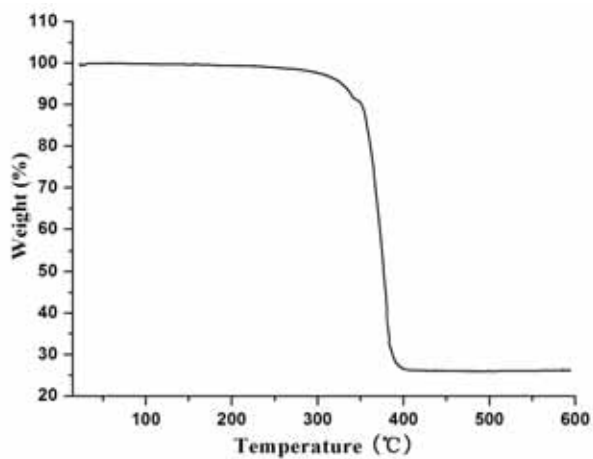

**Fig. S9.** TGA curve of **4**.

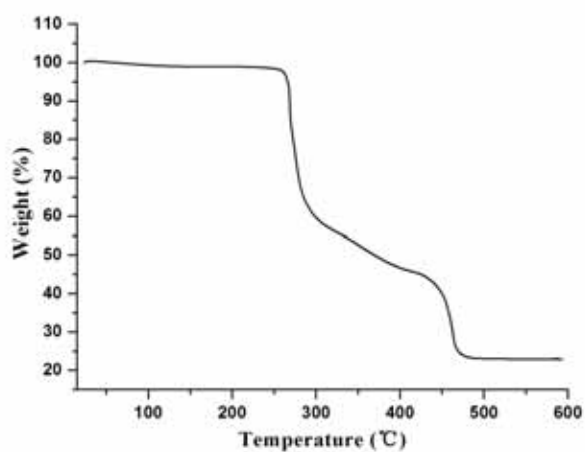

**Fig. S10.** TGA curve of **5**.

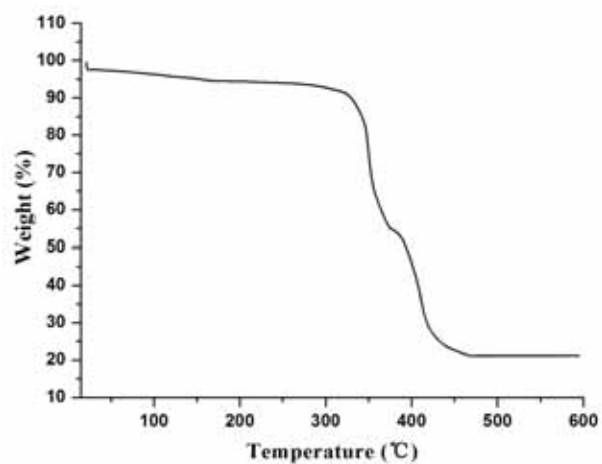

**Fig. S11.** TGA curve of **6**.

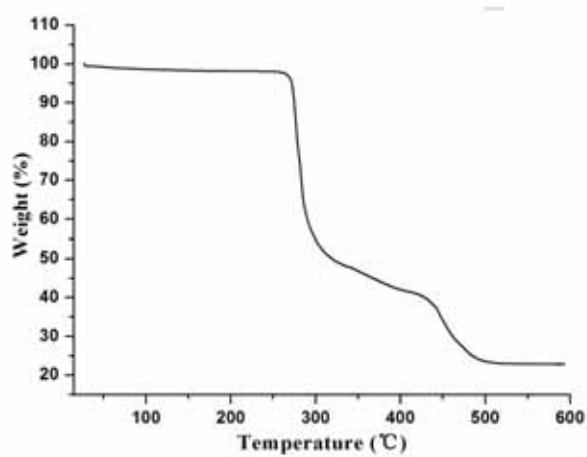

**Fig. S12.** TGA curve of **7**.

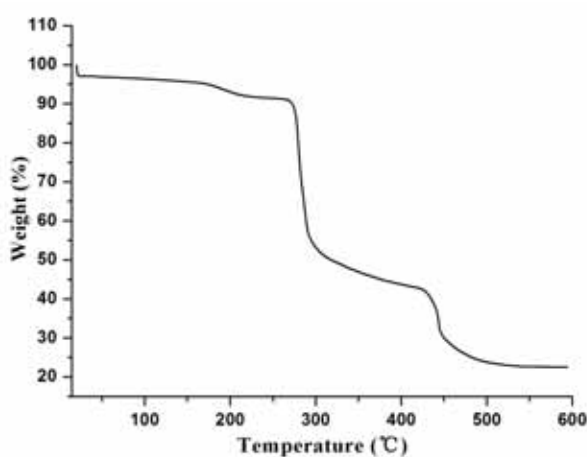

**Fig. S13.** TGA curve of **8**.
